# Supplementary material
Source: Springer Nature journal article supplement (https://www.springermedizin.de/resource/supplementary/12888_2011_1293_MOESM1_ESM.pdf/9480826)

Days between data collection points

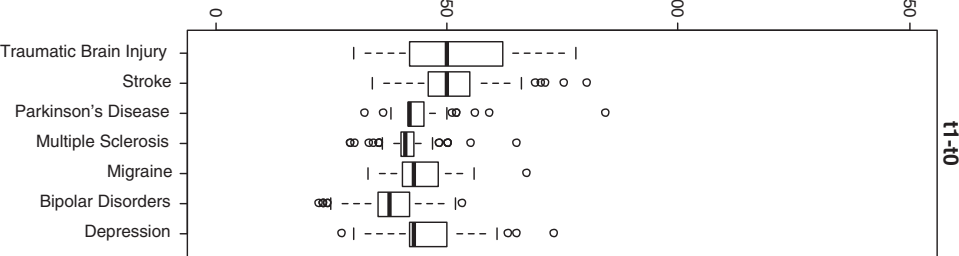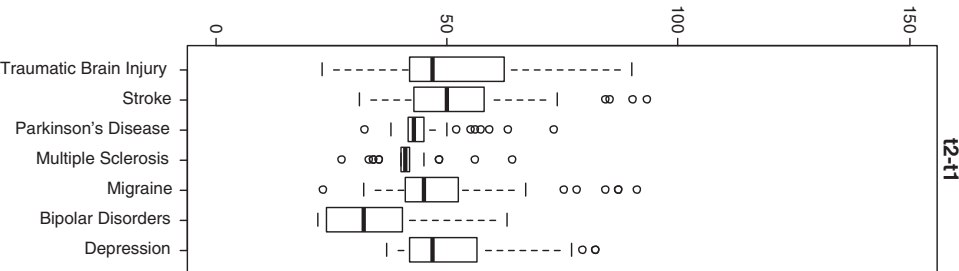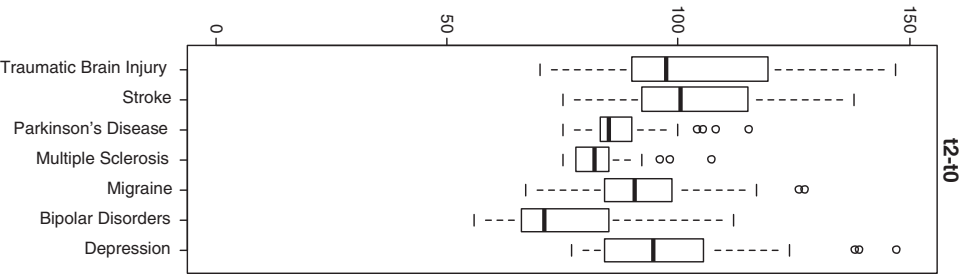

Supplement: MOESM1 [file 9480826]
